# Supplementary material for: TRIB2 safeguards naive T cell homeostasis during aging
Source: PubMed Central journal article supplement — Cell Rep. Author manuscript; Available in PMC 2023 Apr 20. (PMC10118747; doi:10.1016/j.celrep.2023.112195), 2023-03-06
Supplement: NIHMS1887760-supplement-1.pdf [file NIHMS1887760-supplement-1.pdf]

**Cell Reports, Volume 42**

**Supplemental information**

**TRIB2 safeguards naive T cell**

**homeostasis during aging**

**Wenqiang Cao, Ines Sturmlechner, Huimin Zhang, Jun Jin, Bin Hu, Rohit R. Jadhav, Fengqin Fang, Cornelia M. Weyand, and Jörg J. Goronzy**

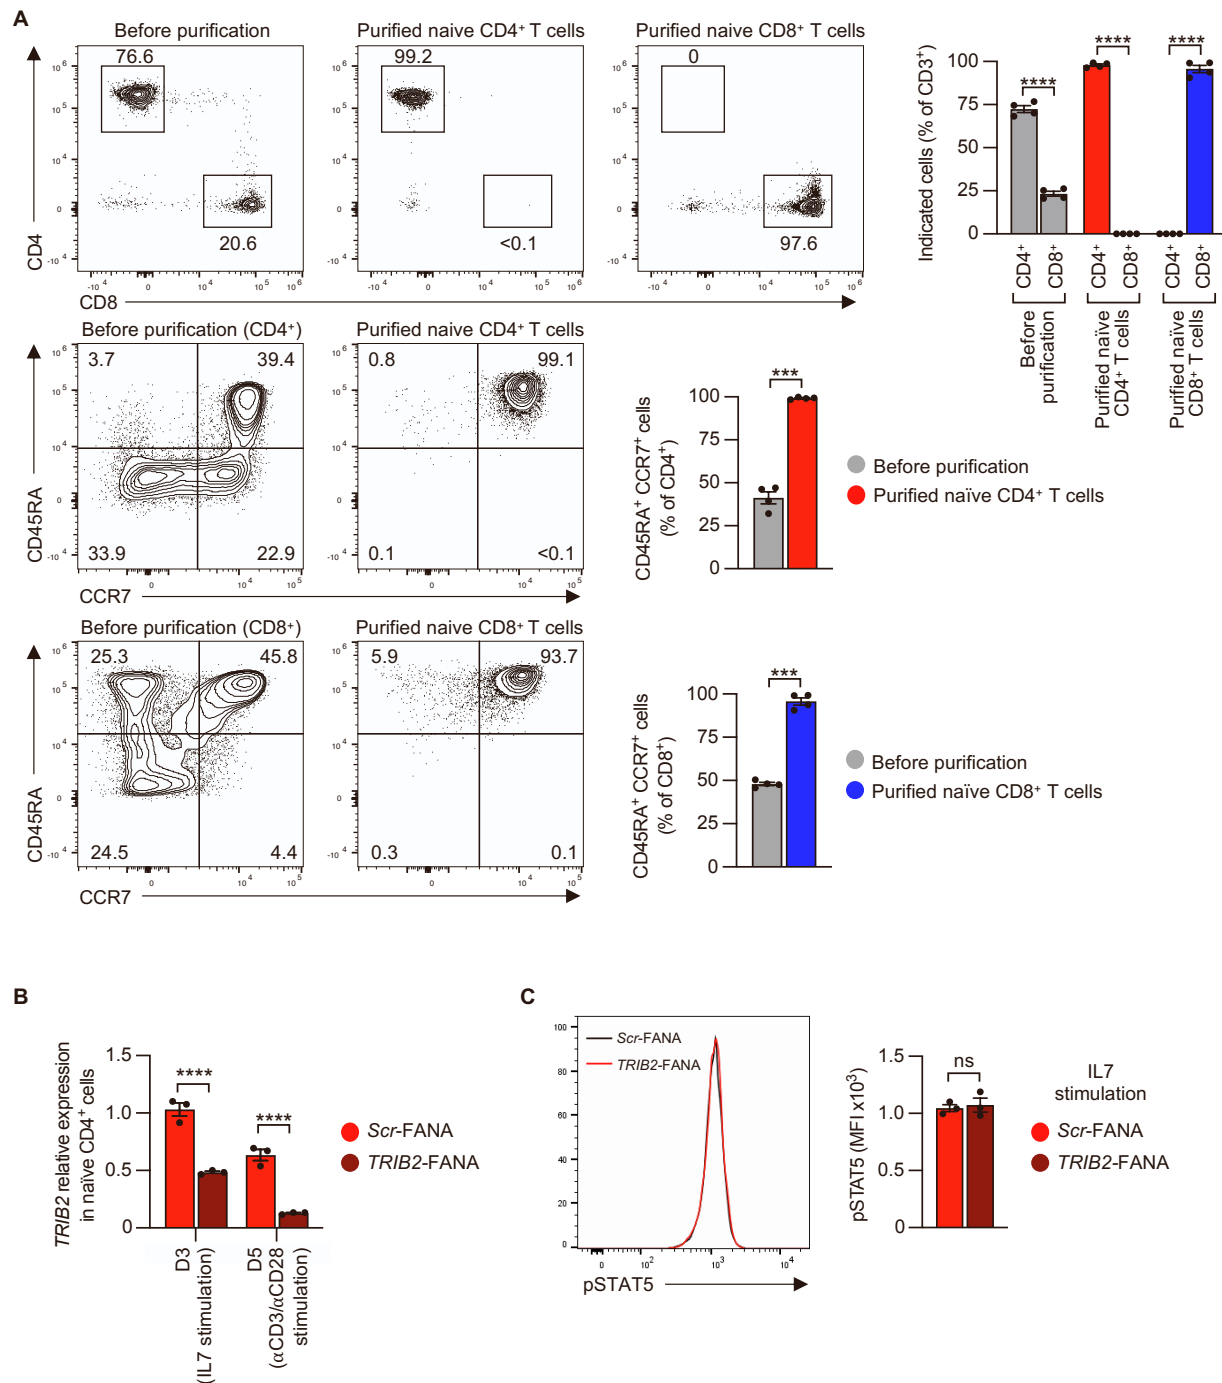

**Figure S1, related to Figures 1 and 2. Influence of TRIB2 on IL7-induced signaling in naïve CD4<sup>+</sup> T cells. (A)** Purification of naïve CD4<sup>+</sup> or naïve CD8<sup>+</sup> T cells from human peripheral blood by MACS (see STAR Methods). Representative contour plots and quantitation of CD4<sup>+</sup> or CD8<sup>+</sup> cells among CD3<sup>+</sup> T cells (top) and proportion of naïve (CD45RA<sup>+</sup> CCR7<sup>+</sup>) cells within CD4<sup>+</sup> or CD8<sup>+</sup> T cells (bottom) as measured by flow

cytometry. **(B)** *TRIB2* knockdown efficiency by *TRIB2*-FANA-ASO after IL7 or anti-CD3/anti-CD28 stimulation of purified human naïve CD4<sup>+</sup> T cells. **(C)** Representative flow cytometry blots and quantification of phospho-STAT5 levels in human naïve CD4<sup>+</sup> T cells 3 days after stimulation with 50ng/ml IL7 and plate-bound anti-CD28 antibody (2 µg/ml) and incubation with *TRIB2*-targetting or scrambled (*Scr*) FANA-ASO. Results are shown as mean ± SEM (A to C). All datapoints represent distinct biological replicates. Results are from 1 experiment (A, C), or 3 experiments (B). Data were compared by two-way ANOVA with post-hoc Šídák test (A top, B) or two-tailed, paired *t*-tests (A bottom, C). \*\*\* $P \leq 0.001$ , \*\*\*\* $P \leq 0.0001$ . ns, not significant.

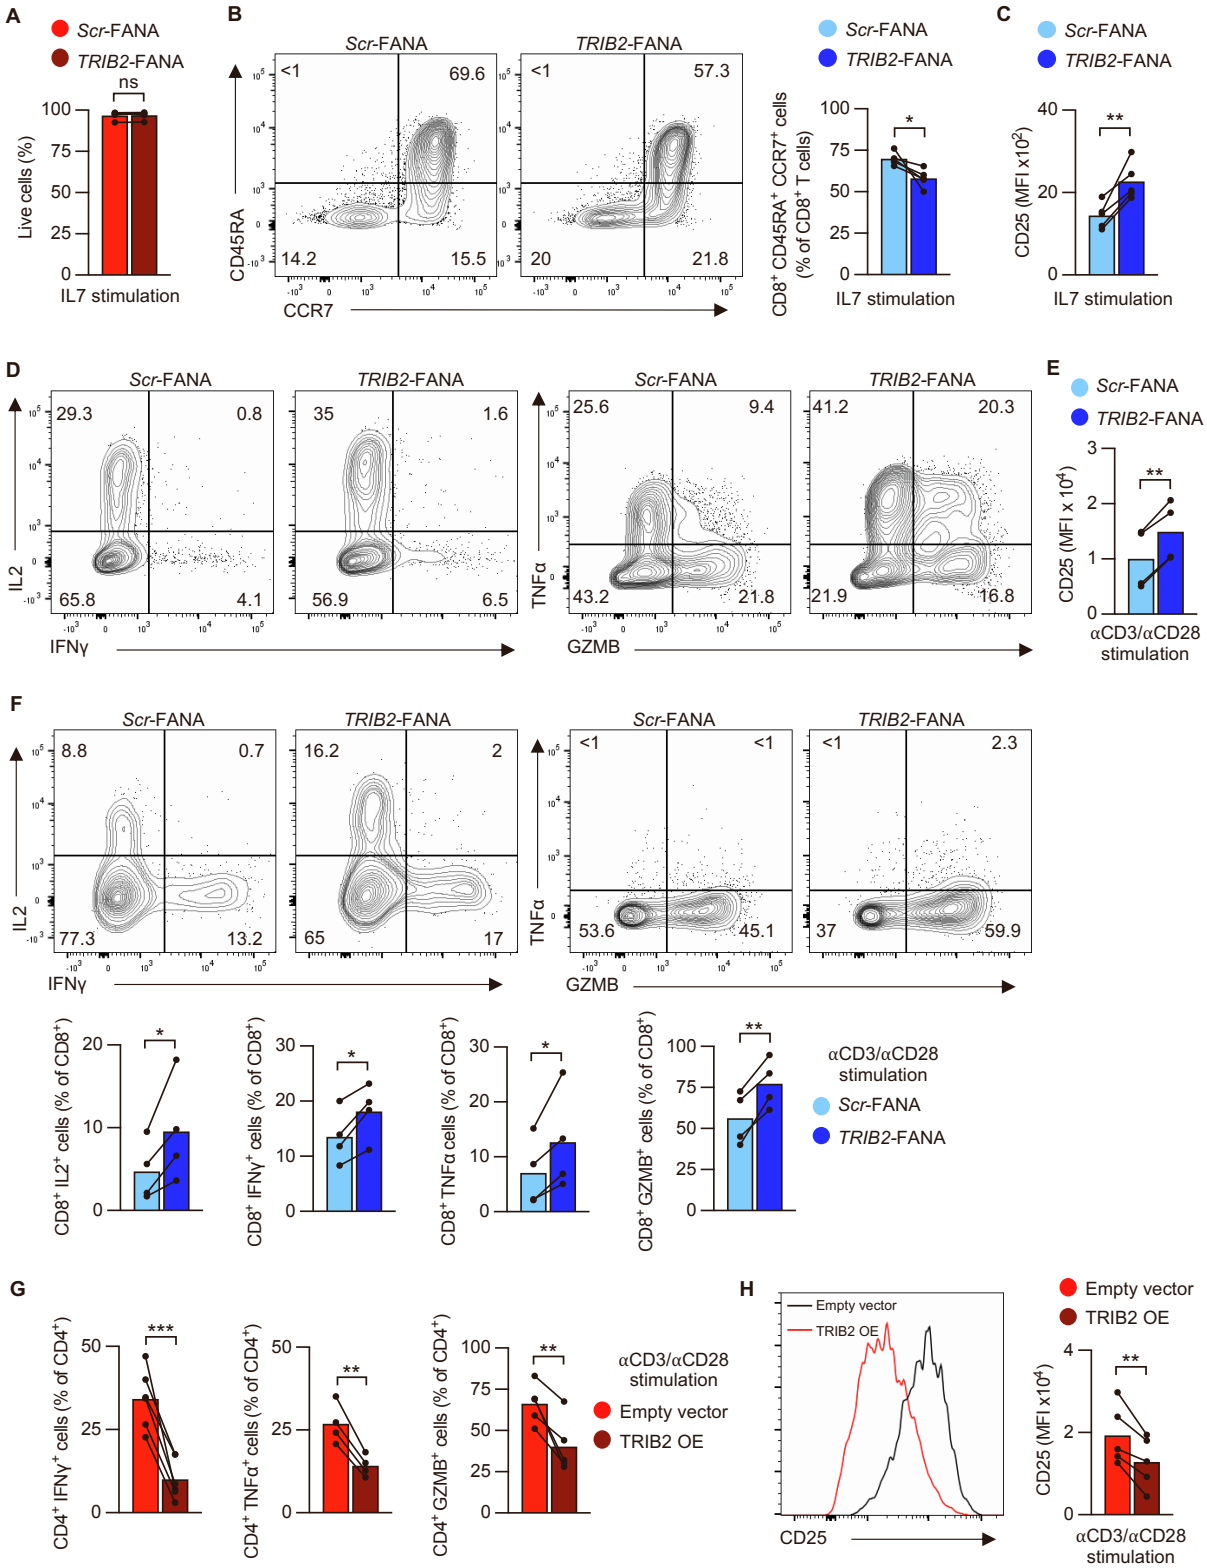

**Figure S2, related to Figure 3. *TRIB2*-deficient T cells are prone to differentiation.**

**(A)** Proportion of live human CD4<sup>+</sup> T cells after FANA-ASO mediated *TRIB2* knockdown

as measured by exclusion of the viability dye in flow cytometry experiments. Data correspond to experiment shown in Figure 3A and 3B. **(B)** Representative contour plots and frequencies of naïve CD45RA<sup>+</sup> CCR7<sup>+</sup> CD8<sup>+</sup> T cells after FANA-ASO-mediated *TRIB2* knockdown. Purified human naïve CD8<sup>+</sup> T cells were cultured with 50 ng/ml IL7 and plate-bound anti-CD28 antibody (2 µg/ml) in the presence of indicated FANA-ASO for 7 days. **(C)** CD25 expression was determined in cells cultured as in (B). MFI, mean fluorescence intensity. **(D)** Representative contour plots of cytokine production by human *TRIB2*-deficient naïve CD4<sup>+</sup> T cells as described in Figure 3D. **(E and F)** Human naïve CD8<sup>+</sup> T cells were cultured with plate-bound anti-CD3/anti-CD28 (5 µg/ml) in the presence of indicated FANA-ASO for 5 days and analyzed for CD25 mean fluorescence intensity, MFI (E) and cytokine production after restimulation with PMA and Ionomycin (F). **(G and H)** Cytokine production (G) and CD25 expression (H) of purified human naïve CD4<sup>+</sup> T cells that were transduced with GFP-containing empty vector or GFP-containing *TRIB2*-overexpressing (OE) lentivirus and cultured for 5 days. For cytokine assessments, cells were re-stimulated with PMA and ionomycin for 4 hours. All datapoints represent distinct biological replicates. Results are pooled from 2 (B, C, E, F) and 3 experiments (A, G, H). Data were compared by two-tailed, paired *t*-tests (A to C, E to H). \**P*<0.05, \*\**P*≤0.01, \*\*\**P*≤0.001. ns, not significant.

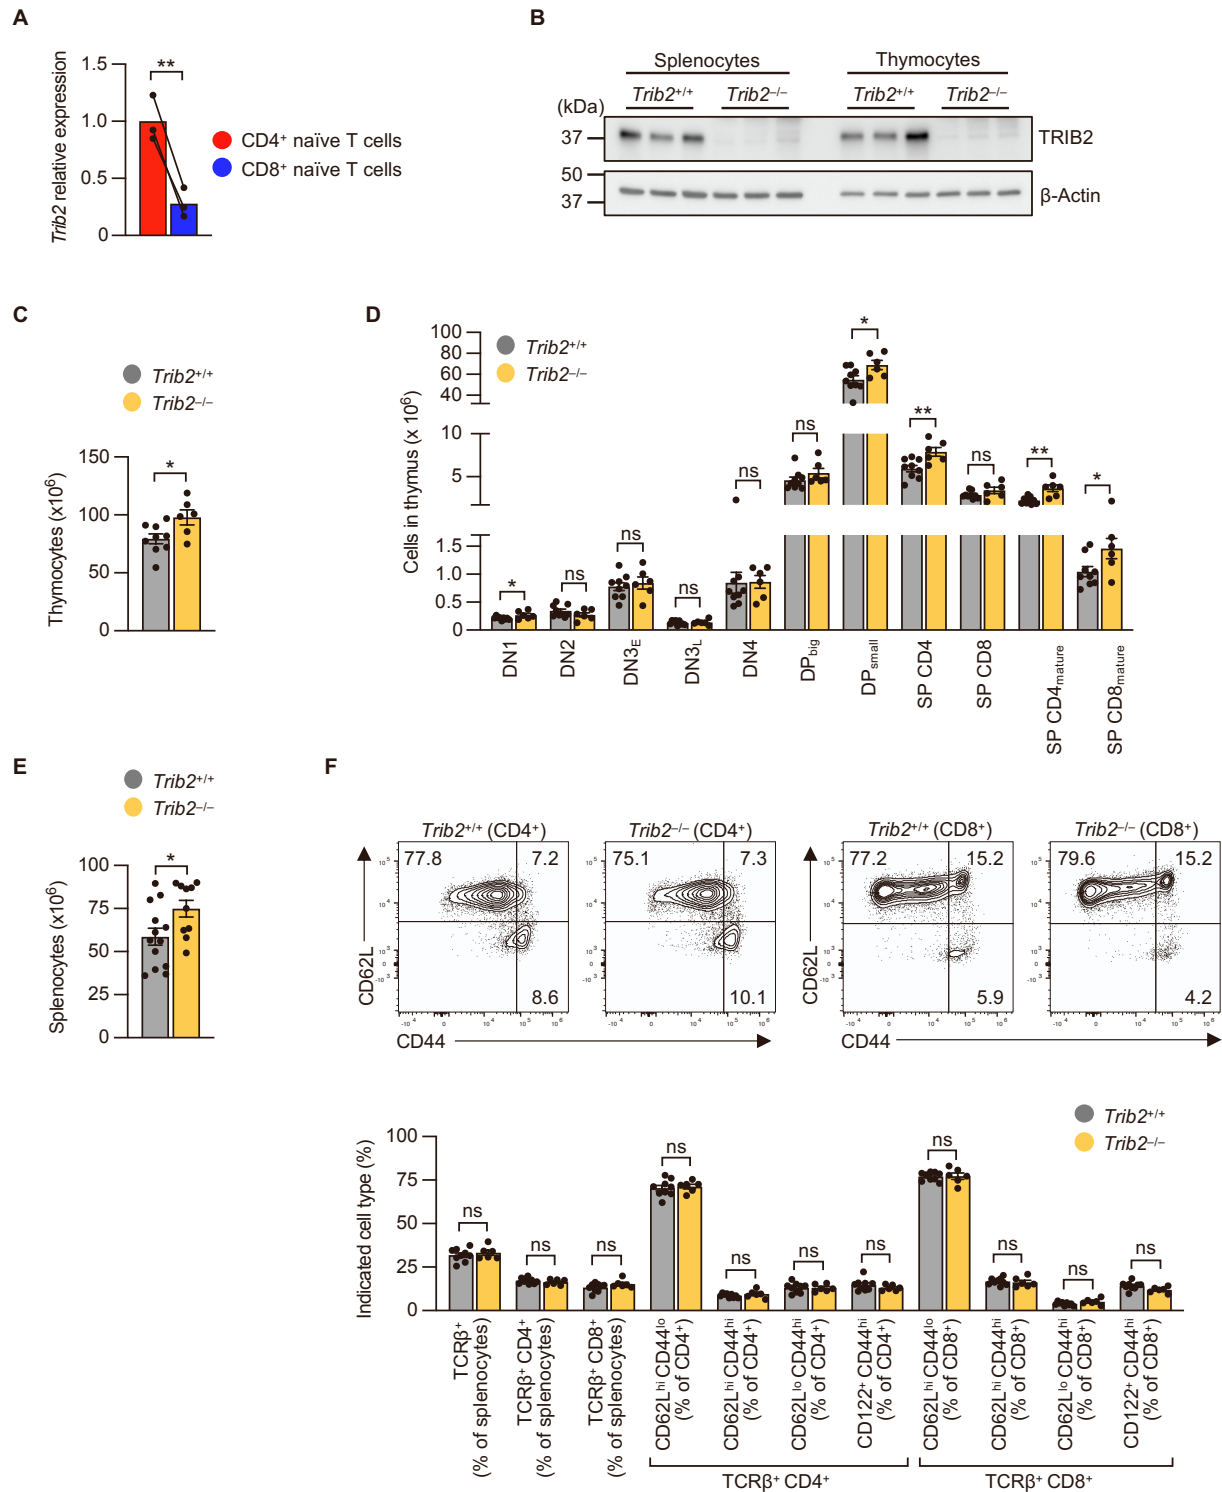

**Figure S3, related to Figure 4. Loss of *Trib2* increases the number of T cells irrespective of subset. (A) *Trib2* mRNA expression in purified murine naïve CD4<sup>+</sup> or CD8<sup>+</sup> T cells from spleens of wild-type mice as measured by RT-qPCR. (B) Immunoblot**

of TRIB2 protein levels in total splenocytes or thymocytes from wild-type and *Trib2* knockout mice. **(C)** Thymocyte numbers of wild-type and *Trib2* knockout mice. **(D)** Thymocyte subset numbers in wild-type and *Trib2* knockout mice as measured by cell counts and flow cytometry. DN1 (CD4<sup>-</sup> CD8<sup>-</sup> CD44<sup>+</sup> CD25<sup>-</sup>), DN2 (CD4<sup>-</sup> CD8<sup>-</sup> CD44<sup>+</sup> CD25<sup>+</sup>), DN3<sub>E</sub> (CD4<sup>-</sup> CD8<sup>-</sup> CD44<sup>-</sup> CD25<sup>+</sup> FSC-A<sup>lo</sup>), DN3<sub>L</sub> (CD4<sup>-</sup> CD8<sup>-</sup> CD44<sup>-</sup> CD25<sup>+</sup> FSC-A<sup>hi</sup>), DN4 (CD4<sup>-</sup> CD8<sup>-</sup> CD44<sup>-</sup> CD25<sup>-</sup>), DP<sub>big</sub> (CD4<sup>+</sup> CD8<sup>+</sup> FSC-A<sup>hi</sup>), DP<sub>small</sub> (CD4<sup>+</sup> CD8<sup>+</sup> FSC-A<sup>lo</sup>), SP CD4 (CD4<sup>+</sup> CD8<sup>-</sup>), SP CD8 (CD4<sup>-</sup> CD8<sup>+</sup>), SP CD4<sub>mature</sub> (CD4<sup>+</sup> CD8<sup>-</sup> TCRβ<sup>+</sup> CD24<sup>-</sup>), SP CD8<sub>mature</sub> (CD4<sup>-</sup> CD8<sup>+</sup> TCRβ<sup>+</sup> CD24<sup>-</sup>). **(E)** Splenocyte numbers of wild-type and *Trib2* knockout mice. **(F)** Proportion of CD4<sup>+</sup> and CD8<sup>+</sup> T cell populations and their naïve/memory phenotype in splenocytes of wild-type and *Trib2* knockout mice as analyzed by flow cytometry. Results are shown as mean ± SEM (C to F). All datapoints represent distinct biological replicates. Results are from 1 experiment (A), pooled from 2 (C, D, F) or 3 experiments (E). Data were compared by two-tailed, unpaired *t*-tests (A, C to F). \**P*<0.05, \*\**P*≤0.01. ns, not significant.

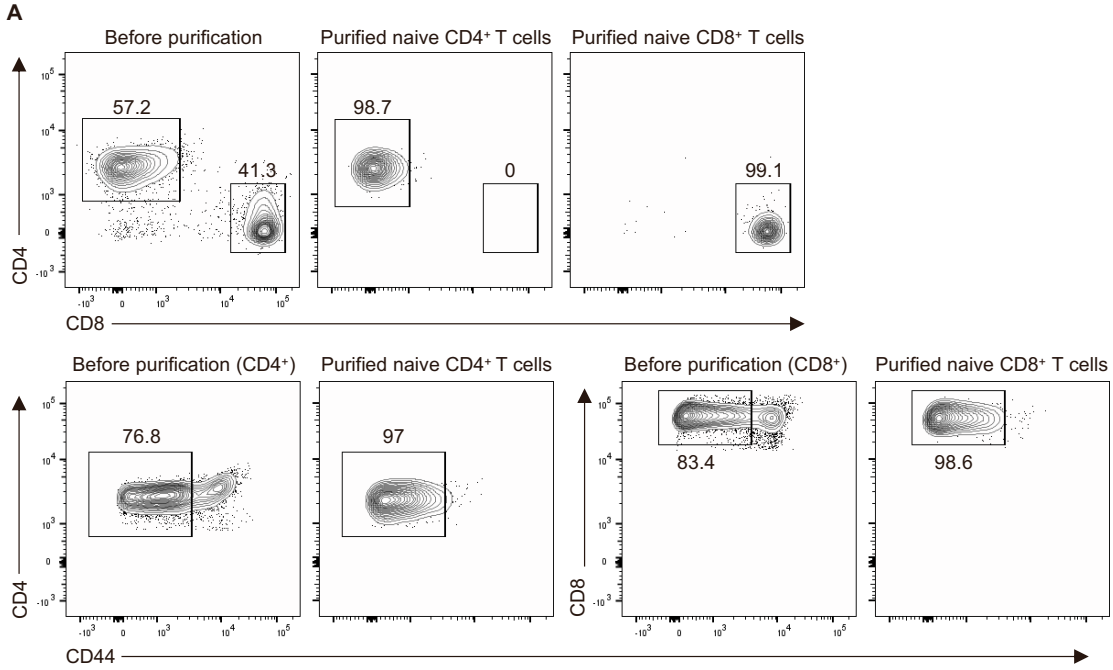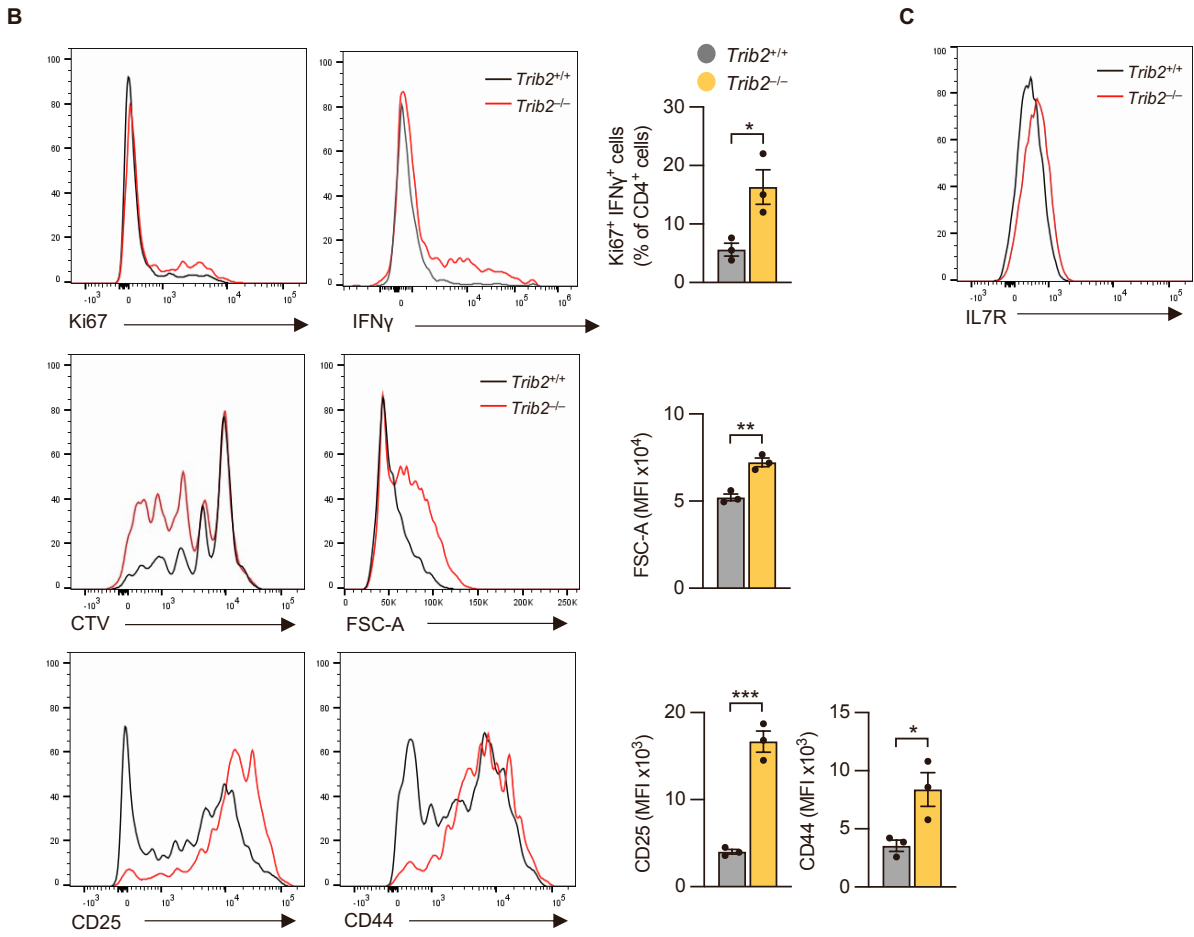



**Figure S4, related to Figure 4. *Trib2* loss promotes T cell proliferation and activation.** **(A)** Purity of naïve CD4<sup>+</sup> or naïve CD8<sup>+</sup> T cells from murine spleens before and after cell sorting. Representative contour plots of CD4<sup>+</sup> and CD8<sup>+</sup> cells (top) and proportion of naïve (CD62L<sup>hi</sup> CD44<sup>-</sup>) cells within CD4<sup>+</sup> or CD8<sup>+</sup> T cells (bottom) as measured by flow cytometry. **(B)** Naïve CD4<sup>+</sup> T cells from wild-type and *Trib2* knockout mice were labeled with CTV and cultured with indicated plate-bound anti-CD3/anti-CD28 antibodies (2.5 µg/ml) for 5 days. Representative histograms and quantitation of IFN $\gamma$  production, Ki67 positivity, CTV dilution, forward scatter (FSC-A), CD25 and CD44 expression. **(C)** IL7R expression in naïve CD4<sup>+</sup> T cells from wild-type or *Trib2* knockout mice. Results are shown as mean  $\pm$  SEM (B). All datapoints represent distinct biological replicates. Results are from 1 experiment (A, B). Data were compared by two-tailed, unpaired *t*-tests (B). \**P*<0.05, \*\**P*≤0.01, \*\*\**P*≤0.001.

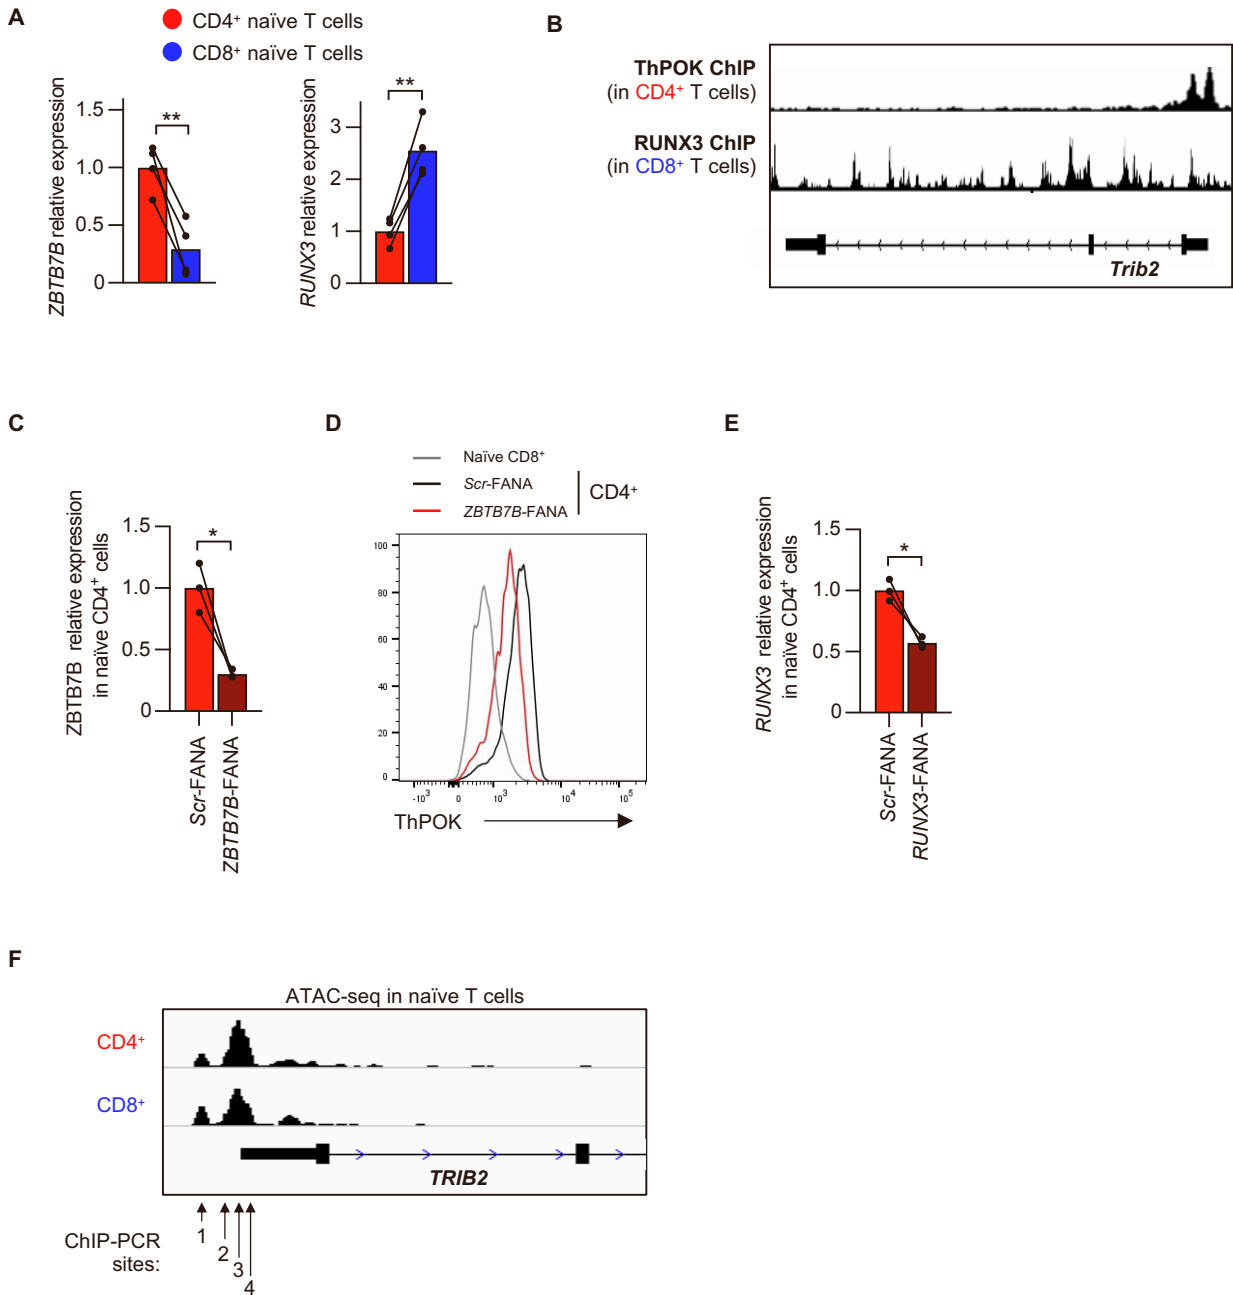

**Figure S5, related to Figure 5. ThPOK and RUNX3 regulate *TRIB2* expression. (A)** Expression of *ZBTB7B* (ThPOK) and *RUNX3* in purified human naïve CD4<sup>+</sup> and CD8<sup>+</sup> T cells as measured by RT-qPCR. **(B)** ThPOK binding in mouse CD4<sup>+</sup> T cells and RUNX3 binding in mouse CD8<sup>+</sup> T cells at the *Trib2* locus from published ChIP-seq data: GSE116506 for ThPOK ChIP-seq; GSE50130 for RUNX3 ChIP-seq. **(C and D)** Efficiency of FANA-ASO-mediated *ZBTB7B* (ThPOK) knockdown in purified human naïve CD4<sup>+</sup> T cells as determined by RT-qPCR (C) or flow cytometry (D). **(E)** Efficiency of FANA-ASO-

mediated *RUNX3* knockdown in purified human naïve CD4<sup>+</sup> T cells as determined by RT-qPCR. **(F)** ATAC-seq chromatin accessibility profiles at the *TRIB2* locus of human naïve CD4<sup>+</sup> or CD8<sup>+</sup> T cells (analyzed from SRA accession code PRJNA478249 and dbGaP accession code phs001187.v1.p1). Putative transcription factor binding sites 1 through 4 are indicated. All datapoints represent distinct biological replicates. Results are from 1 experiment (A), pooled from 2 experiments (C, E). Data were compared by two-tailed, paired *t*-tests (A, C, E). \**P*<0.05, \*\**P*≤0.01.

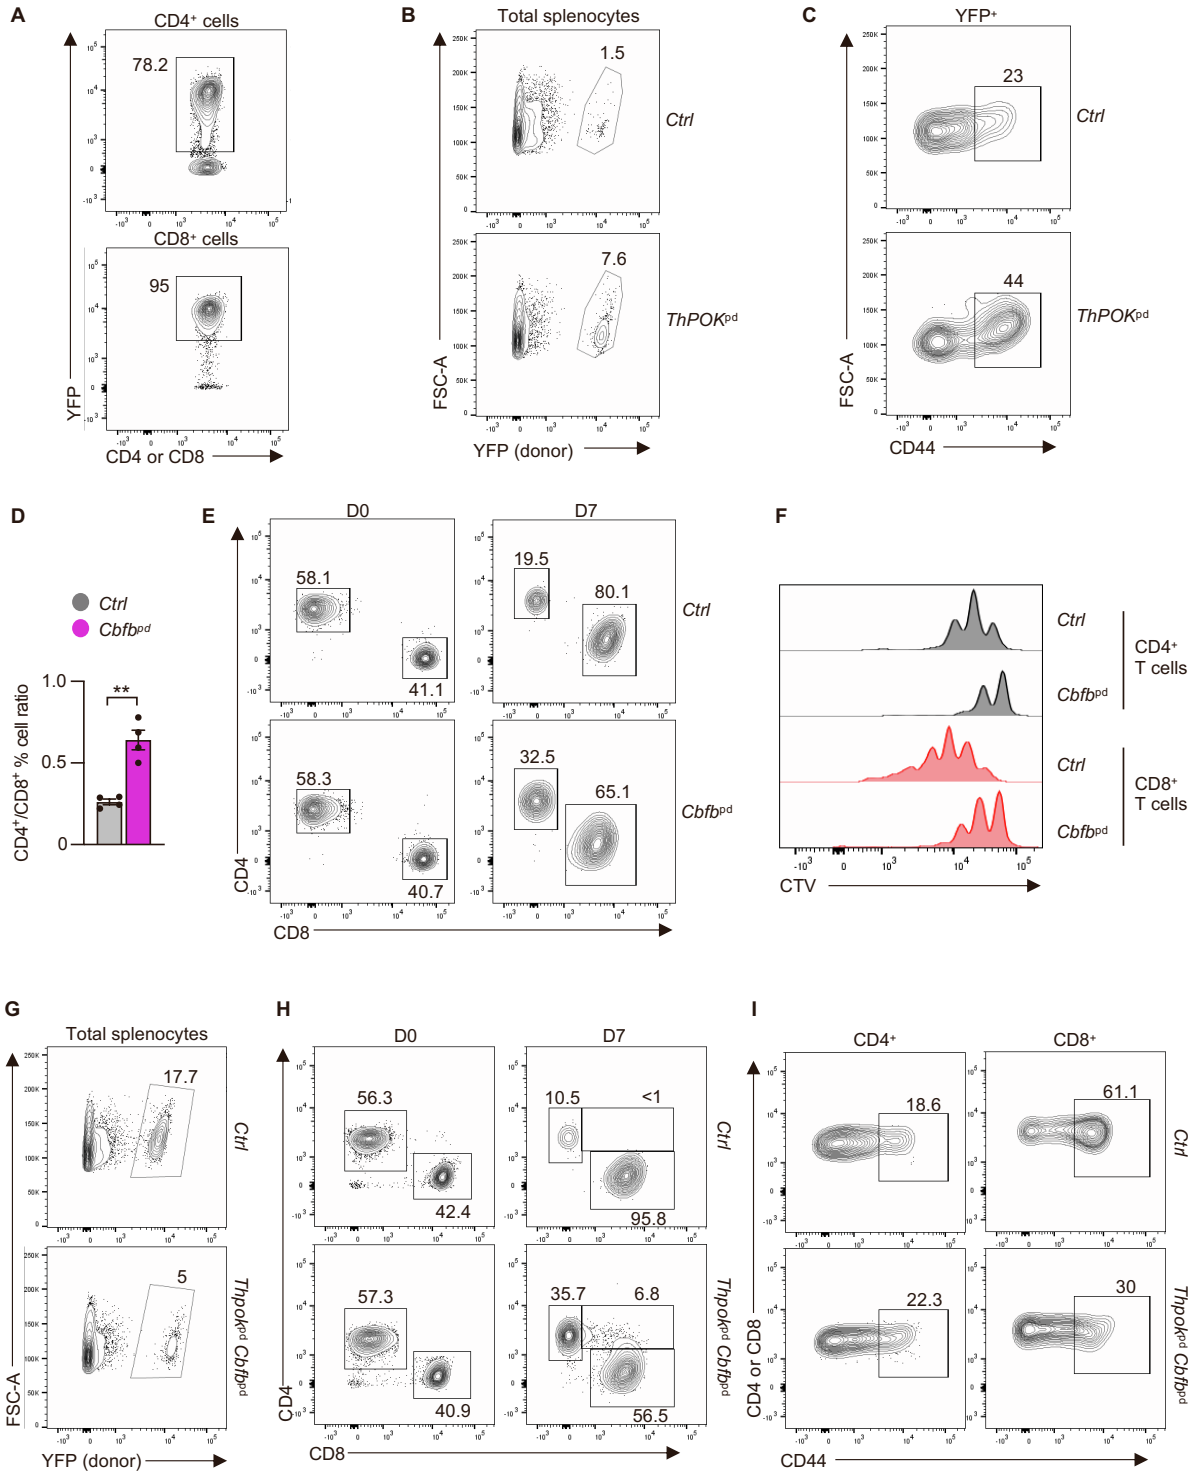

**Figure S6, related to Figure 5. ThPOK and RUNX3 regulate lymphopenia-induced proliferation of T cells. (A)** Deletion efficiency of CD2-Cre recombinase as measured by YFP expression in T cells from murine spleen (originating from the Cre-sensitive

transgene LoxP-Stop cassette-LoxP-YFP). CD2-Cre was used to conditionally knock out *Cbfb* and/or *ThPOK* in peripheral T cells. **(B)** Representative contour plots of splenocytes from lymphopenic mice that were reconstituted with YFP<sup>+</sup> donor cells of *Ctrl* (CD2-Cre<sup>+</sup> *ThPOK*<sup>fl/+</sup> *Rosa26-YFP*<sup>fl/+</sup>) or *ThPOK*<sup>pd</sup> (CD2-Cre<sup>+</sup> *ThPOK*<sup>fl/fl</sup> *Rosa26-YFP*<sup>fl/fl</sup>) mice. Splenocytes were analyzed 7 days post-transfer. **(C)** Representative CD44 contour plots of YFP<sup>+</sup> donor cells. **(D to F)** Characterization of *Cbfb*<sup>pd</sup> T cells during lymphopenia. YFP<sup>+</sup> CD4<sup>+</sup> CD44<sup>-</sup> and YFP<sup>+</sup> CD8<sup>+</sup> CD44<sup>-</sup> T cells were sorted from *Ctrl* (CD2-Cre<sup>+</sup> *Cbfb*<sup>fl/+</sup> *Rosa26-YFP*<sup>fl/+</sup>) and *Cbfb*<sup>pd</sup> (CD2-Cre<sup>+</sup> *Cbfb*<sup>fl/fl</sup> *Rosa26-YFP*<sup>fl/fl</sup>) mice, respectively (D0). CD4<sup>+</sup> and CD8<sup>+</sup> T cells were pooled for each genotype, labeled with CTV and adoptively transferred into irradiated wild-type mice. One week later (D7), splenocytes were analyzed by flow cytometry for ratios of CD4<sup>+</sup> and CD8<sup>+</sup> T cells (D and E) and their CTV dilution (F). **(G to I)** Representative contour plots of donor cell recovery (G), CD4<sup>+</sup> and CD8<sup>+</sup> T cell subset proportions (H) and CD44 expression (I) after adoptive transfer of CD2-Cre<sup>+</sup> *ThPOK*<sup>fl/+</sup> *Cbfb*<sup>fl/+</sup> *Rosa26-YFP*<sup>fl/+</sup> (*Ctrl*) and CD2-Cre<sup>+</sup> *ThpPOK*<sup>fl/fl</sup> *Cbfb*<sup>fl/fl</sup> *Rosa26-YFP*<sup>fl/fl</sup> (*Thpok*<sup>pd</sup> *Cbfb*<sup>pd</sup>) T cells in Figure 5J-N. Data are presented as means ± SEM. All datapoints represent distinct biological replicates. Results are representative of 4 experiments (A), or of 2 experiments with 3-4 mice in each group (D). Data were compared by two-tailed, unpaired *t*-test (D). \*\**P*≤0.01.

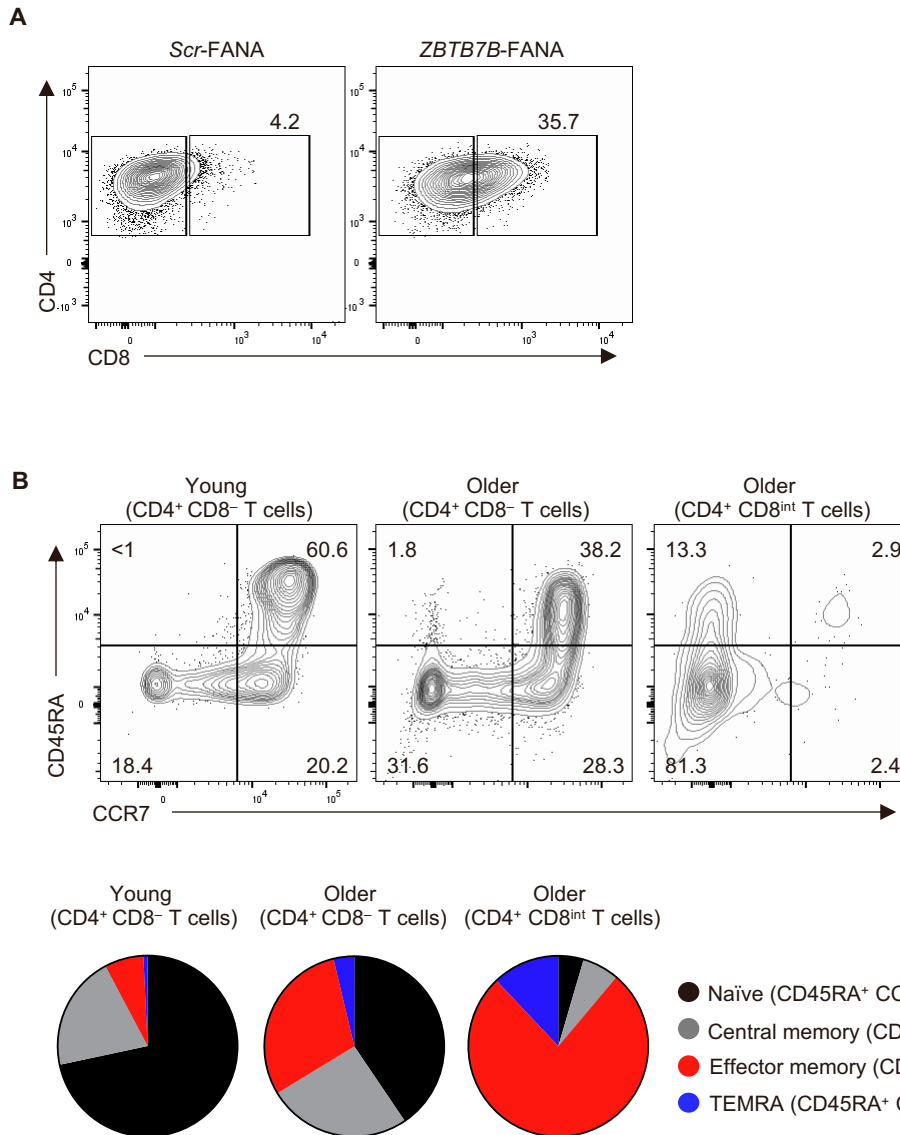

**Figure S7, related to Figure 7. Age-related *TRIB2* deficiency correlates with effector traits.** (A) CD8 $\alpha$  expression after *ZBTB7B* (ThPOK) knockdown in purified human naïve CD4<sup>+</sup> T cells. Cells were activated with anti-CD3/anti-CD28 Dynabeads at a bead-to-cell ratio of 1:5 in presence of indicated FANA-ASO for 9 days. CD4 and CD8 levels were analyzed by flow cytometry. Contour plots are representative of 3 experiments. (B) Phenotype of CD4<sup>+</sup> CD8<sup>int</sup> T cells as assessed by flow cytometry. Representative contour blots (top) and distribution of cell population with indicate differentiation states (bottom).

| <b>Name</b>             | <b>Forward Primer (5' – 3')</b> | <b>Reverse Primer (5' – 3')</b> |
|-------------------------|---------------------------------|---------------------------------|
| <b>RT-qPCR primers</b>  |                                 |                                 |
| <i>mTrib2</i>           | ATACACAGGTCTACCCCTATCAC         | ATGCGACAAGTTCGGAGTCTC           |
| <i>mZbtb7b</i>          | CCCGAGGATGACCTGATTGG            | CCTGCGTCCTGATGGTGAG             |
| <i>mRunx3</i>           | CAGGTTCAACGACCTTCGATT           | GTGGTAGGTAGCCACTTGGG            |
| <i>mActb</i>            | GGCTGTATTCCCCTCCATCG            | CCAGTTGGTAACAATGCCATGT          |
| <i>hTRIB2</i>           | ATACACAGGTCTACCCTTATCAC         | ATGCGACAAGTTCGGAGTCTC           |
| <i>hZBTB7B</i>          | GTCCCCAGAGCTACGAACC             | AGCTTAGGTAGGCCATCAGGT           |
| <i>hRUNX3</i>           | GCGAGGGAAGAGTTTCACCC            | TTGATGGCTCGGTGGTAGGT            |
| <i>hACTB</i>            | ATGGCCACGGCTGCTTCCAGC           | CATGGTGGTGCCGCCAGACAG           |
| <b>ChIP-PCR primers</b> |                                 |                                 |
| <i>Site1</i>            | AATGGAGAGGAGGATGTCGG            | TCATGTTCTGGCGCTTTTC             |
| <i>Site2</i>            | GAAAAGCGCCAGGAACATGA            | GTGAAATATCCTTCCGCGGC            |
| <i>Site3</i>            | TCACTTTGTTTACCTCCCCG            | CGCCCATCAATCAGCCCC              |
| <i>Site4</i>            | GGAGGCTCCGTGGAAATGT             | GGCGAGGCGGTATTAATAGTTAC         |

**Table S1, related to Key Resources Table. Primer sequences.**
